# Supplementary material for: Structural evolution of SrLaAl1−x(Zn0.5Ti0.5)xO4ceramics and effects on their microwave dielectric properties
Source: Royal Society of Chemistry journal article supplement (doi:10.1039/c6tc00841k), 2016-01-01
Supplement: c6tc00841k1.pdf [file c6tc00841k1.pdf]

## Supporting information

### Structural Evolution of $\text{SrLaAl}_{1-x}(\text{Zn}_{0.5}\text{Ti}_{0.5})_x\text{O}_4$ Ceramics and Effects on Their Microwave Dielectric Properties

Bing Liu, Lei Li, Xiao Qiang Liu and Xiang Ming Chen\*

Laboratory of Dielectric Materials, School of Materials Science and Engineering, Zhejiang University, Hangzhou 310027, China.

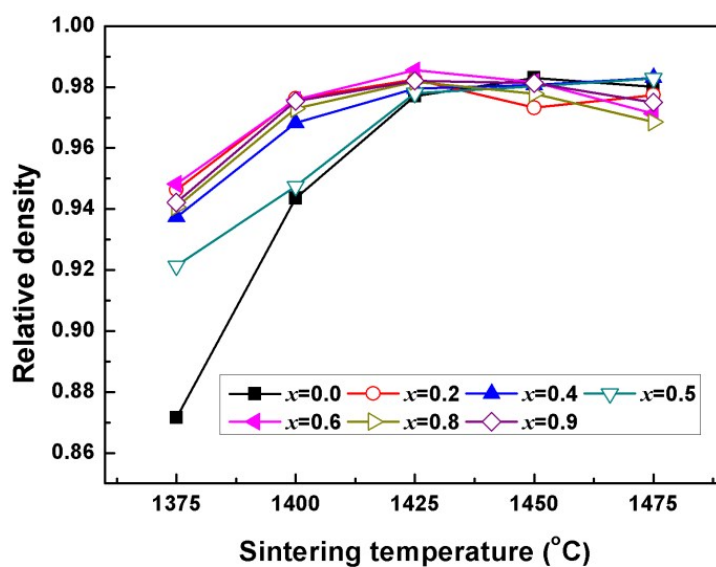

**SI-Fig. 1** The relative density of  $\text{SrLaAl}_{1-x}(\text{Zn}_{0.5}\text{Ti}_{0.5})_x\text{O}_4$  ceramics as a function of sintering temperature.

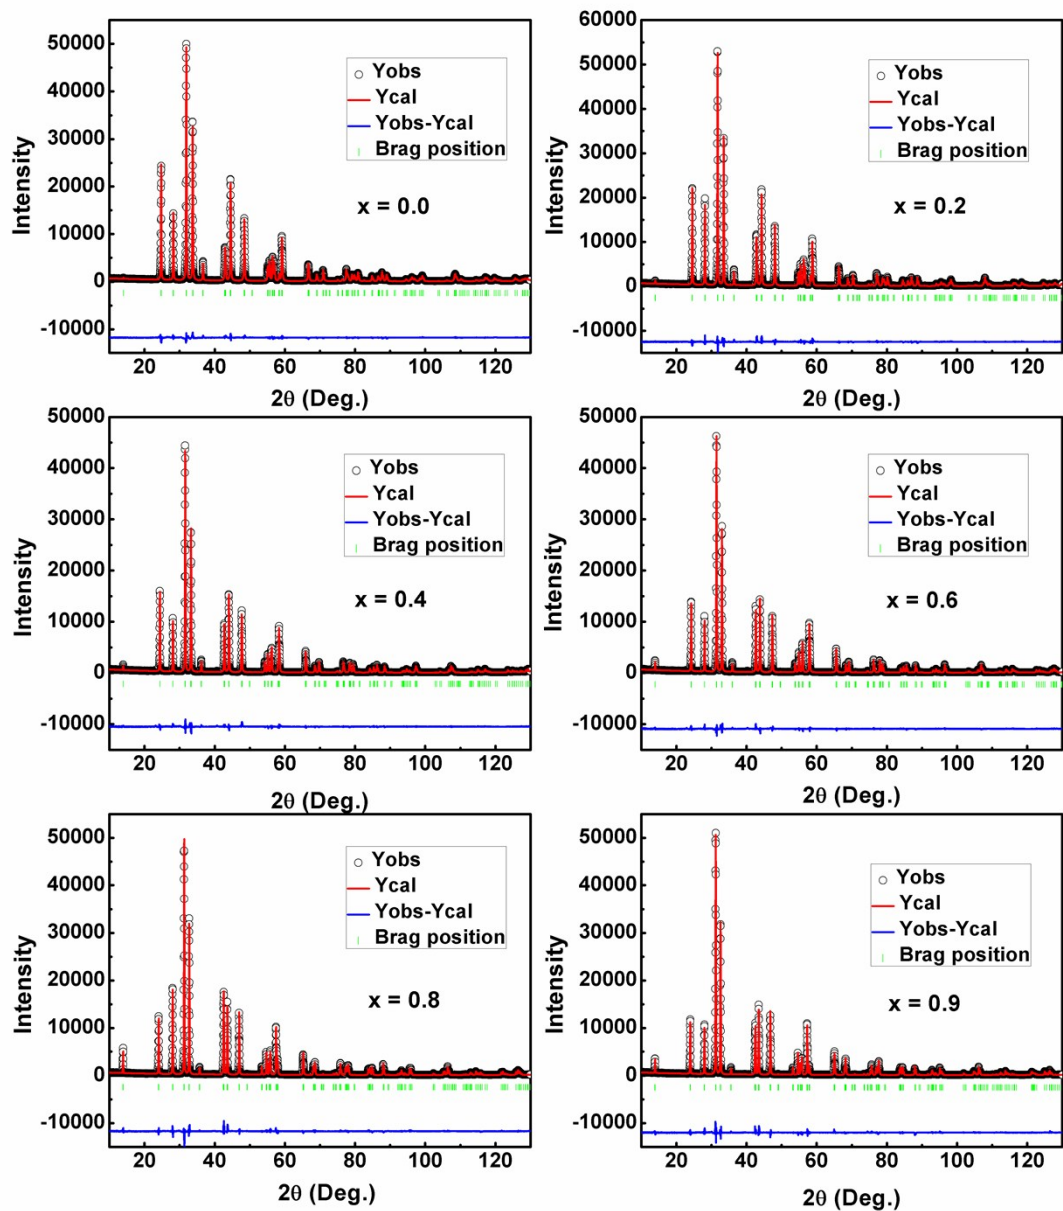

**SI-Fig. 2** Experimental (circles) and calculated (red line) XRD profiles for the SrLaAl<sub>1-x</sub>(Zn<sub>0.5</sub>Ti<sub>0.5</sub>)<sub>x</sub>O<sub>4</sub> samples. The short vertical lines below the patterns mark the positions of Bragg reflections. The bottom continuous line is the difference between the observed and the calculated intensity.

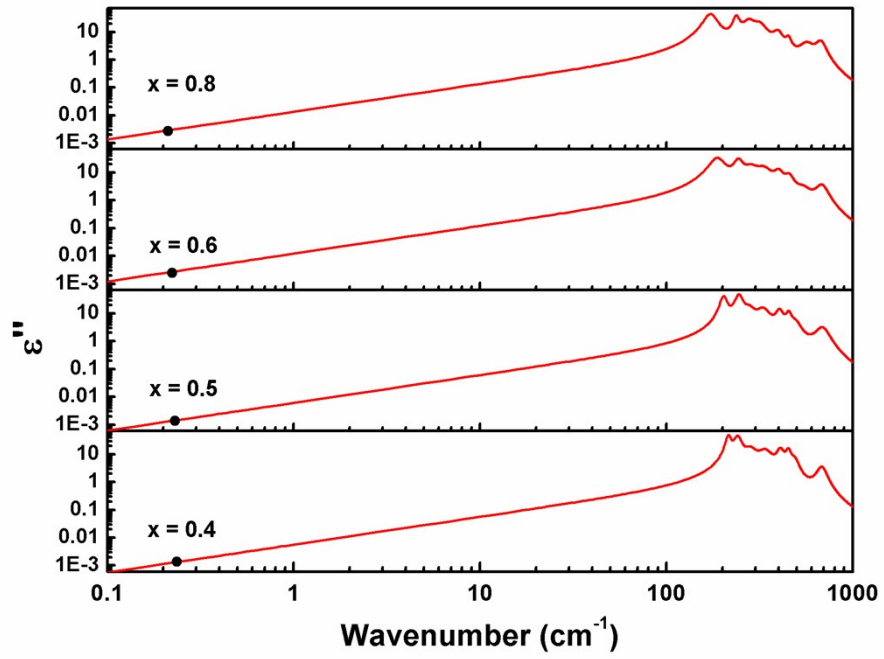

**SI-Fig. 3** The imaginary parts of the complex dielectric responses (red lines) of  $\text{SrLaAl}_{1-x}(\text{Zn}_{0.5}\text{Ti}_{0.5})_x\text{O}_4$  ( $x = 0.4, 0.5, 0.6, 0.8$ ) ceramics. Black circles are the experimental data measured at microwave range.
